# Supplementary material for: Nanoemulsion-loaded hydrogel coatings for inhibition of bacterial virulence and biofilm formation on solid surfaces
Source: PubMed Central journal article supplement (PMC6482171; doi:10.1038/s41598-019-43016-w), 2019-04-24
Supplement: 41598_2019_43016_MOESM1_ESM.pdf [file 41598_2019_43016_MOESM1_ESM.pdf]

# Supplementary Information

## **Nanoemulsion-loaded hydrogel coatings for inhibition of bacterial virulence and biofilm formation on solid surfaces**

**Prateeksha G, Saroj Kanta Barik and Brahma Nand Singh**

Herbal Nanobiotechnology Lab, Pharmacology Division, CSIR-National Botanical Research Institute,  
Lucknow-226001, India

## Supplementary Tables

**Table S1.** Stability studies of prepared NEs

| NE     | Stability up to 30 days     |      |        |       | Stability up to 60 days     |      |        |       | Stability up to 90 days     |      |        |       |
|--------|-----------------------------|------|--------|-------|-----------------------------|------|--------|-------|-----------------------------|------|--------|-------|
|        | Centrifugation <sup>a</sup> | 4 °C | -20 °C | 45 °C | Centrifugation <sup>a</sup> | 4 °C | -20 °C | 45 °C | Centrifugation <sup>a</sup> | 4 °C | -20 °C | 45 °C |
| CGF-NE | √                           | √    | √      | √     | √                           | √    | √      | √     | √                           | √    | √      | √     |
| WGF-NE | √                           | √    | √      | √     | √                           | √    | √      | √     | *                           | *    | *      | *     |

√ Neither phase separation nor creaming; \* Partial phase separation and creaming

<sup>a</sup>Centrifugation for 20 min at 10,000 rpm at 25 °C

**Table S2.** MIC of CGF-EO, WGF-EO, CGF-NE and WGF-NE

| Treatment | <sup>a</sup> MIC (%) |
|-----------|----------------------|
| CGF-EO    | 0.5±0.028            |
| WGF-EO    | 0.3±0.051            |
| CGF-NE    | 0.1±0.017            |
| WGF-NE    | 0.025±0.0032         |

<sup>a</sup>Minimum inhibitory concentration (MIC) was calculated using growth curve analysis. MIC is determined as the lowest concentration that exhibited complete inhibition of visible growth of the bacteria. DMSO was used as a solvent control for CGF-EO and WGF-EO, whereas the mixture of DW, surfactant (S; Tween 80) and co-surfactant (CS; propylene glycol) in the ration of 94.7:0.2:0.1 were used as a solvent control for CGF-NE and WGF-NE.

Data represent mean ± SE of six different experiments.

**Table S3.** MIC and sub-MIC concentrations of eugenol and methyl salicylate<sup>a</sup>

| Treatment         | Concentration (%) |
|-------------------|-------------------|
| <b>MIC</b>        |                   |
| Eugenol           | 0.05±0.002        |
| Methyl salicylate | 0.25±0.03         |
| <b>Sub-MIC</b>    |                   |
| Eugenol           | 0.005±0.0004      |
| Methyl salicylate | 0.025±0.0017      |

<sup>a</sup>Minimum inhibitory concentration (MIC) and sub-MIC was calculated using growth curve analysis. DMSO was used as a solvent control. Data represent mean ± SE of six different experiments.

**Table S4.** MIC of eugenol-NE and methyl salicylate-NE<sup>a</sup>

| Treatment            | Concentration (%) |
|----------------------|-------------------|
| <b>MIC</b>           |                   |
| Eugenol-NE           | 0.005±0.0007      |
| Methyl salicylate-NE | 0.025±0.0043      |

<sup>a</sup>Minimum inhibitory concentration (MIC) was calculated using growth curve analysis. Data represent mean ± SE of six different experiments. The mixture of DW, surfactant (S; Tween 80) and co-surfactant (CS; propylene glycol) in the ration of 94.7:0.2:0.1 were used as a solvent control.

**Table S5.** Antibiofilm activity of eugenol-NE and methyl salicylate-NE using COMSTAT analysis

| Treatment                       | Volume/Area<br>( $\mu\text{m}^3 \mu\text{m}^{-2}$ ) | Mean thickness<br>( $\mu\text{m}$ ) | Substratum<br>coverage (%) |
|---------------------------------|-----------------------------------------------------|-------------------------------------|----------------------------|
| Control                         | 19.2 $\pm$ 1.83                                     | 16.9 $\pm$ 1.44                     | 94 $\pm$ 8.52              |
| Eugenol (0.0005%)               | 18.9 $\pm$ 1.99                                     | 16.6 $\pm$ 1.82                     | 93 $\pm$ 7.74              |
| Eugenol-NE (0.00051%)           | 2.77 $\pm$ 0.41                                     | 2.13 $\pm$ 0.46                     | 9.66 $\pm$ 0.83            |
| Methyl salicylate (0.0025%)     | 19.1 $\pm$ 1.83                                     | 16.9 $\pm$ 1.59                     | 94.4 $\pm$ 9.92            |
| Methyl salicylate -NE (0.0025%) | 3.45 $\pm$ 0.41                                     | 2.42 $\pm$ 0.22                     | 12 $\pm$ 1.15              |

The mixture of DW, surfactant (S; Tween 80) and co-surfactant (CS; propylene glycol) in the ration of 94.7:0.2:0.1 were used as a solvent control.

Data represent mean  $\pm$  SE of six different experiments.

**Table S6.** List of primers of *E. coli*

| Gene        | Forward (5'-3')            | Reverse (5'-3')            | Product length |
|-------------|----------------------------|----------------------------|----------------|
| <i>escJ</i> | ACGAAAGTCAACCCTCCTCAG      | ATCTGAATGACCGATGGTGCT      | 79             |
| <i>escR</i> | ACCTAGCCAGTTAGTGGCATC      | AACCTCTGGCGAGCTGATGA       | 187            |
| <i>espD</i> | ATTAGTGACGCCCTCTGCTG       | ATTTGCTGAGGGTCAACGGT       | 150            |
| <i>rrsG</i> | ACTGAGACACGGTCCAGACT       | TGCGCTTTACGCCCAGTAAT       | 259            |
| <i>csgF</i> | CTCAGGCCATCCAGTCACAA       | AAACCCGAAACCTGGATGGT       | 178            |
| <i>fimA</i> | CACGACGGTTAATGGTGGGA       | GTCCAGGATCTGCACACCAA       | 310            |
| <i>flhD</i> | ACCTCCGAGTTGCTGAAACA       | TGCCAGCTTAACCATTGCG        | 168            |
| <i>fliA</i> | CGGAAACTGAGGTAGCGGAA       | CTCCAGCACTGCACCAATCT       | 299            |
| <i>qseB</i> | GATTGGCGACGGCATCAAAA       | TCAGGATCAGTACCGGCTCA       | 203            |
| <i>fimC</i> | GGTGGAAAATGCCGATGGTG       | AAACTTTCCCGGTCCTGTGG       | 138            |
| <i>tnaA</i> | TCACCCGCGAAACCTACAAA       | AGCCAGTCCAGATTCATGCC       | 235            |
| <i>bcsA</i> | TTTTCGACTGCGACCACGTA       | TAGAACAGCGTGCCTTCGTT       | 175            |
| <i>csgD</i> | CGCGGCGAATGCTACTTTAC       | TCGTTATTAGACGCGCCGAT       | 149            |
| <i>csgB</i> | AACCTTCTTTGCAGGCGACA       | ATGTCGCGGTACGGGTAATC       | 241            |
| <i>csgG</i> | GCCTGATGTCGGCTATCGAA       | TGTCATTCTGCCGTTCTGCT       | 102            |
| <i>csgA</i> | ATCTGACCCAACGTGGCTTT       | CTGAGTTACGTTGACGGTGGA      | 146            |
| <i>fimD</i> | GGGGAGGCGATGGTAATAGC       | AACAAGCACCACCGTATCGT       | 194            |
| <i>fimH</i> | GCAGTTCTCCTACAGCGGTT       | AATGACGACCGAACCAACGA       | 167            |
| <i>stx1</i> | TTACAGCGTGTTGCAGGGAT       | CAGACTGCGTCAGTGAGGTT       | 112            |
| <i>stx2</i> | GCGACGCCTGATTGTGTAAC       | CCCGTAATTTGCGCACTGAG       | 143            |
| <i>luxS</i> | TTCTTCGTTGCTGTTGATGC       | TGGAAGACGTGCTGAAAGTG       | 152            |
| <i>luxR</i> | CTCGAACGCCTGAACTTTTC       | TGGAAGACGTGCTGAAAGTG       | 231            |
| <i>ecpA</i> | TGCTGACGTAACAGCTCAGG       | CCTCGATAGCCACGTCAAAT       | 164            |
| <i>ecpR</i> | ACATCTGGTCTCCCCATGAC       | TACCGCGGATAACCATTCAT       | 179            |
| <i>tir</i>  | CGTCTTCCGTTACGGTACT        | ACTTCTGATCCTGGCCACTG       | 154            |
| Z2200       | TTG CGA TAC CAA TGT TGC AT | TGG AAC GGA ATG GTA TTG GT | 141            |
| <i>ler</i>  | CGA CCA GGT CTG CCC TTC T  | GCG CGG AAC TCA TCG AAA    | 174            |

# Supplementary Figures

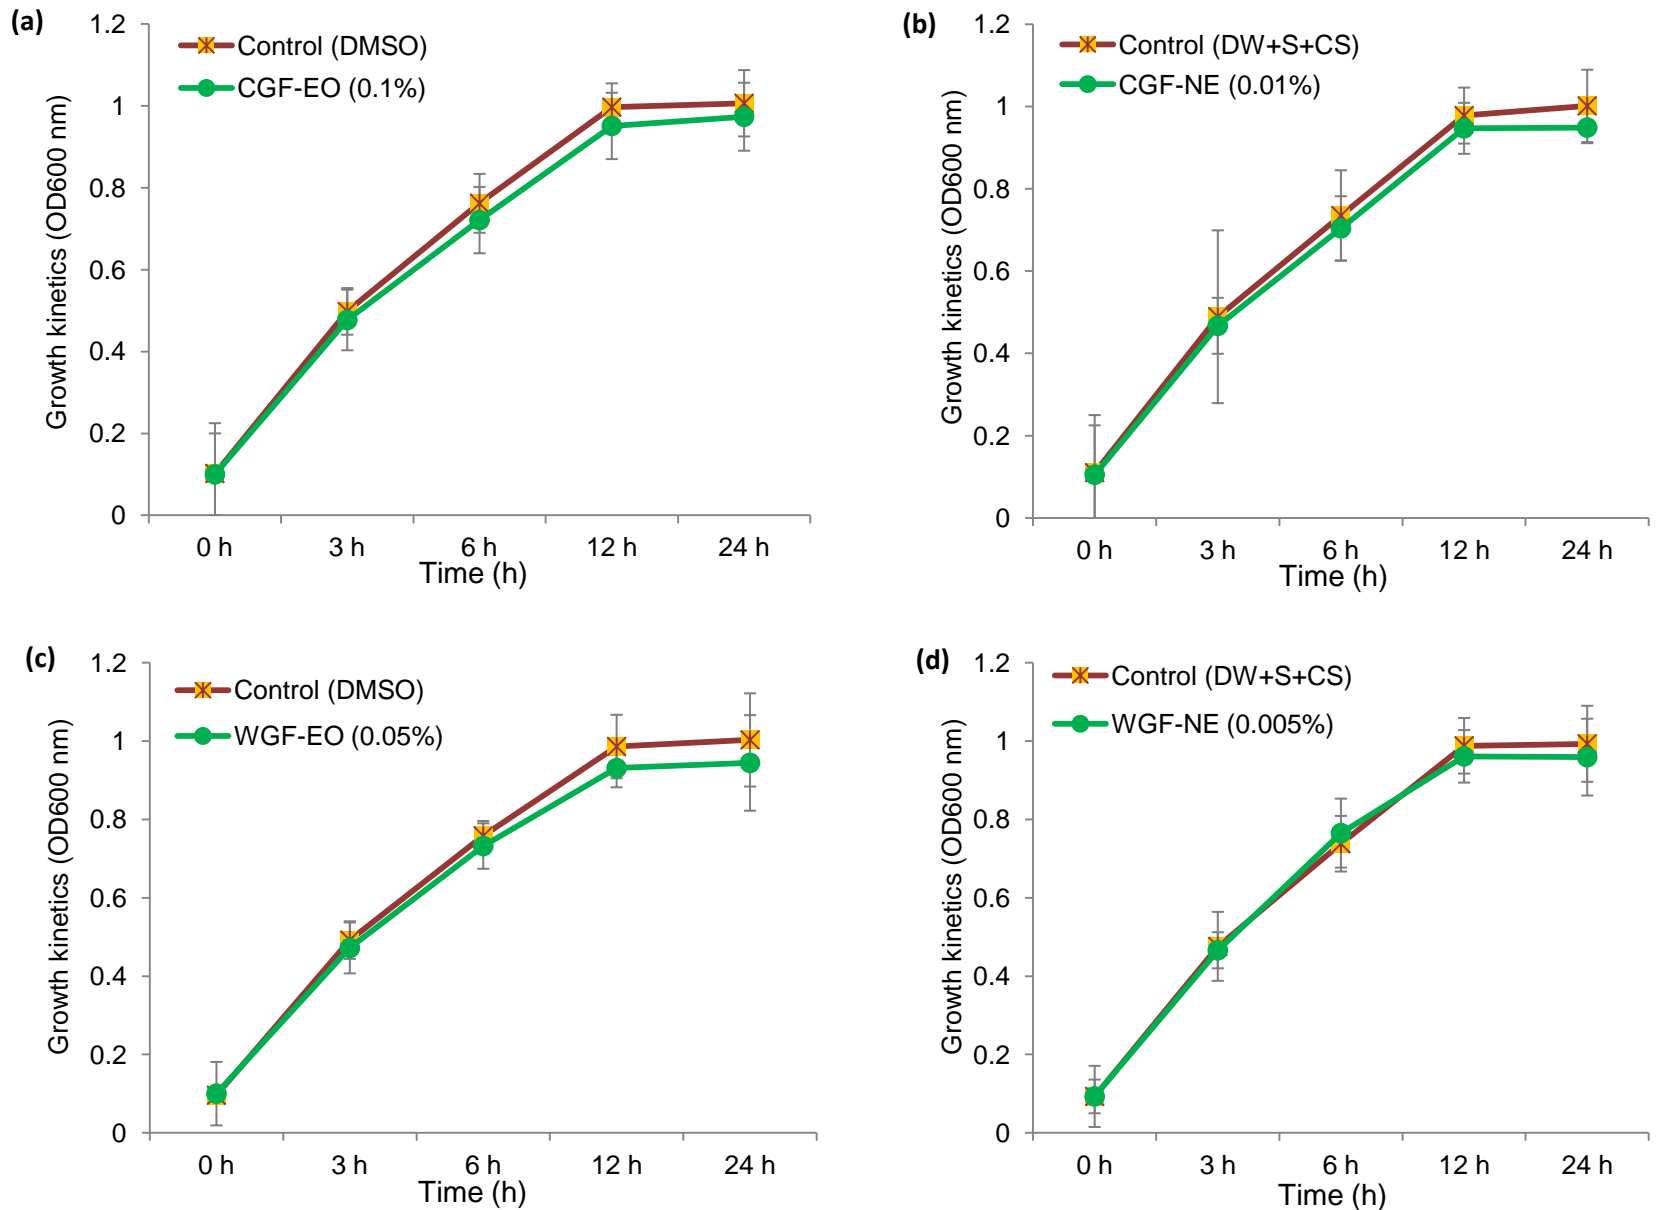

Figure S1. Growth kinetics of ECOH in the presence or absence of CGF-EO (a), CGF-NE (b), WGF-EO (c) and WGF-NE (d) with indicated concentrations for the period of 24 h. DMSO was used as a solvent control for CGF-EO and WGF-EO, whereas the mixture of DW, surfactant (S; Tween 80) and co-surfactant (CS; propylene glycol) in the ration of 94.7:0.2:0.1 was used as a solvent control for CGF-NE and WGF-NE.



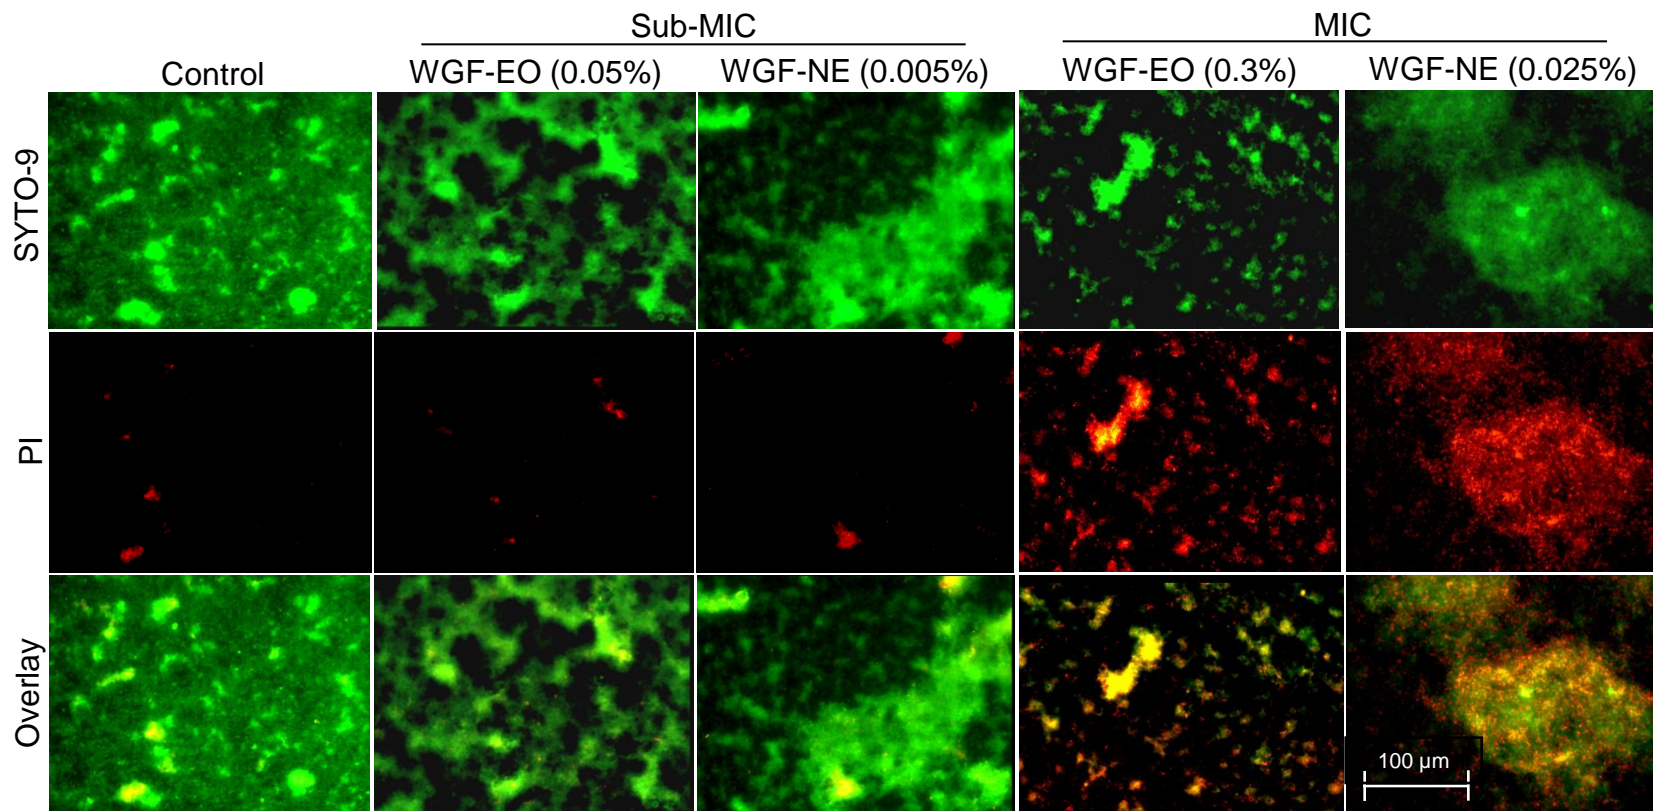

Figure S2. Cell viability measurement of ECOH. Cells were exposed to mentioned test samples with indicated concentrations for 24 h. Cells were analyzed by fluorescence microscope using bacterial cell viability kit. The mixture of DW, surfactant (S; Tween 80) and co-surfactant (CS; propylene glycol) in the ration of 94.7:0.2:0.1 was used as a solvent control.

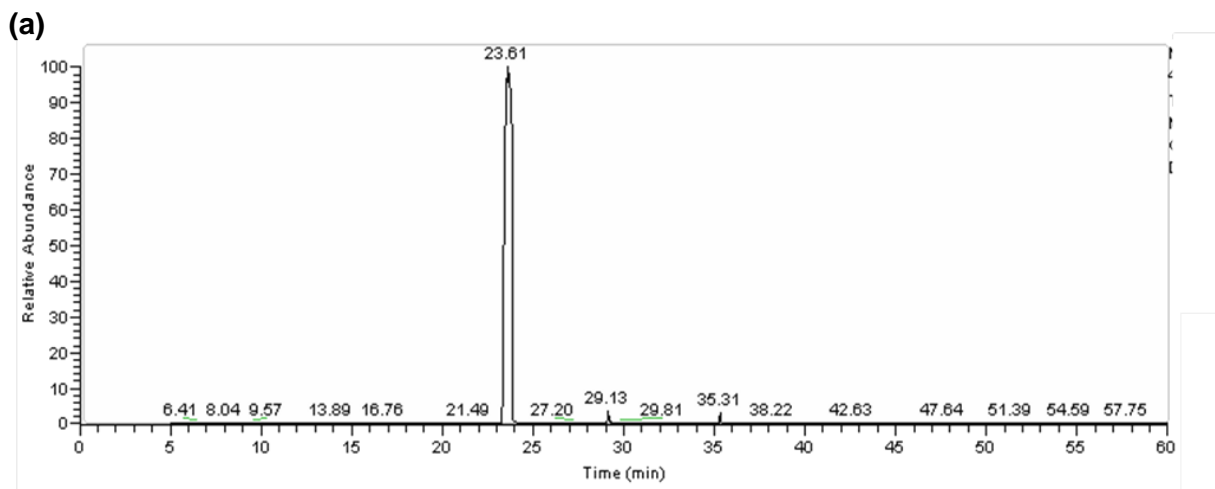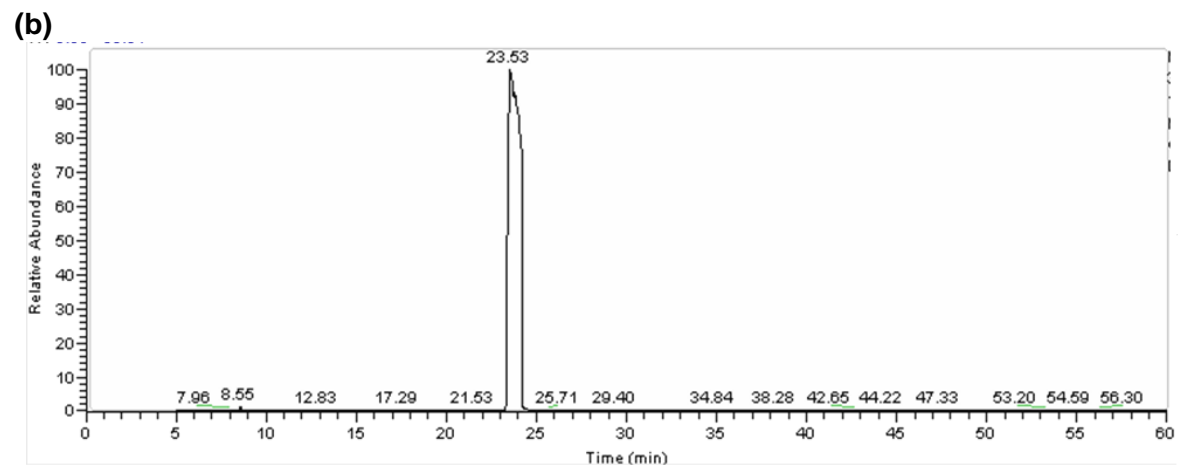

Figure S3. GC-MS chromatograms of WGF-EO (a) and CGF-EO (b) .

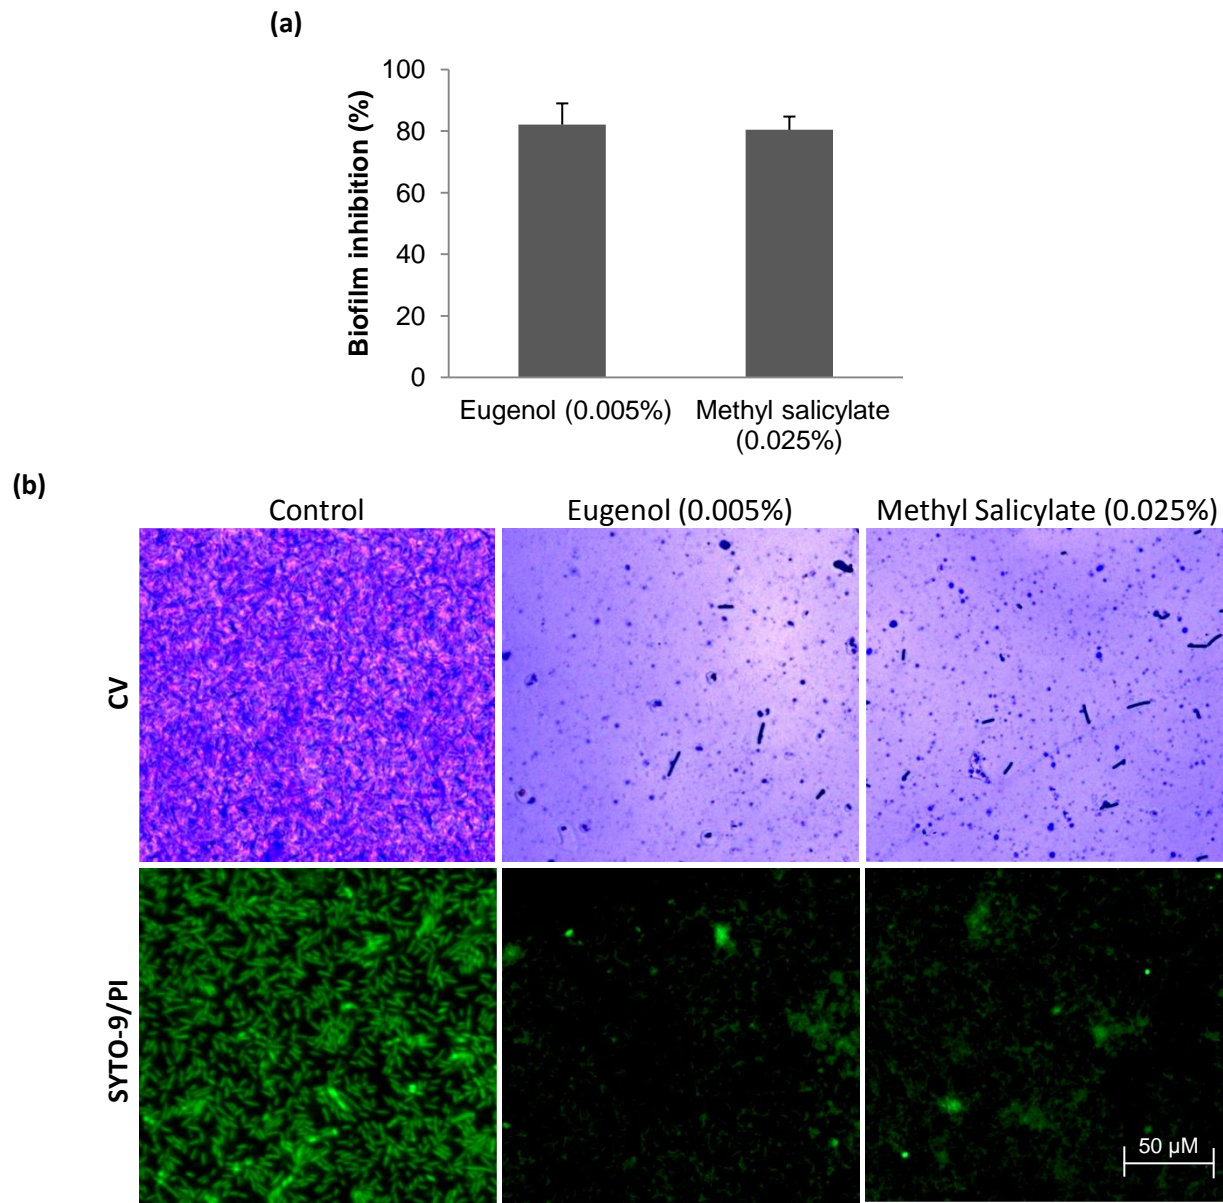

Figure S4. Impact of eugenol and methyl salicylate on ECOH biofilm formation. (a) The formation of biofilm by ECOH was measured using CV staining assay in the presence of major bioactive compounds after culture for 24 h in 96-well plates. Biofilm formation by ECOH in the presence of essential oils (0.005%) was also confirmed through (a) CV cell staining by phase contrast microscopy and (b) bacterial cell viability kit by fluorescence microscopy. DMSO was used as a solvent control.

## Eugenol-NE

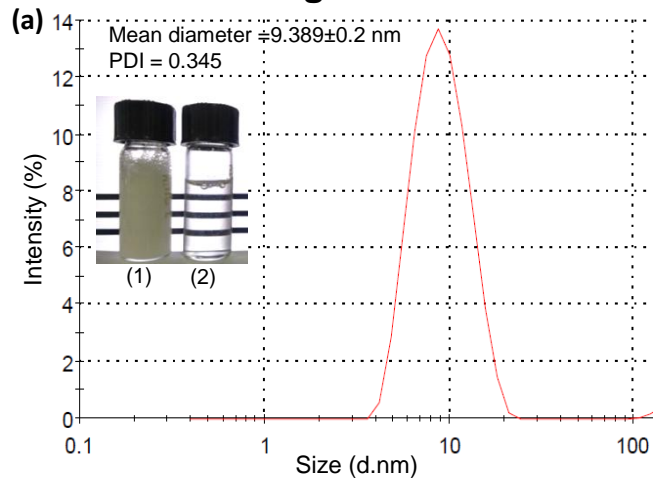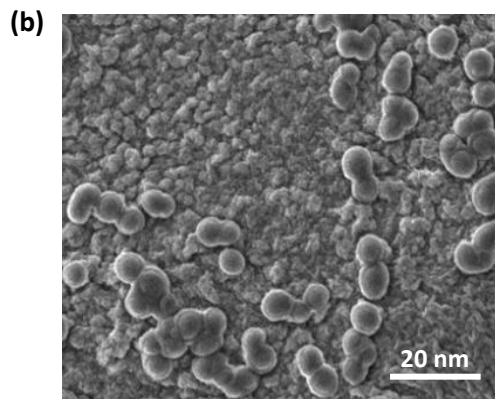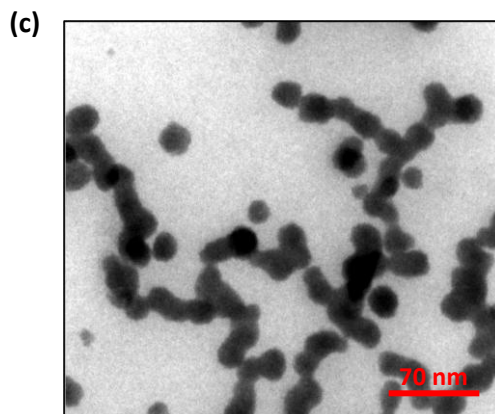

## Methyl salicylate-NE

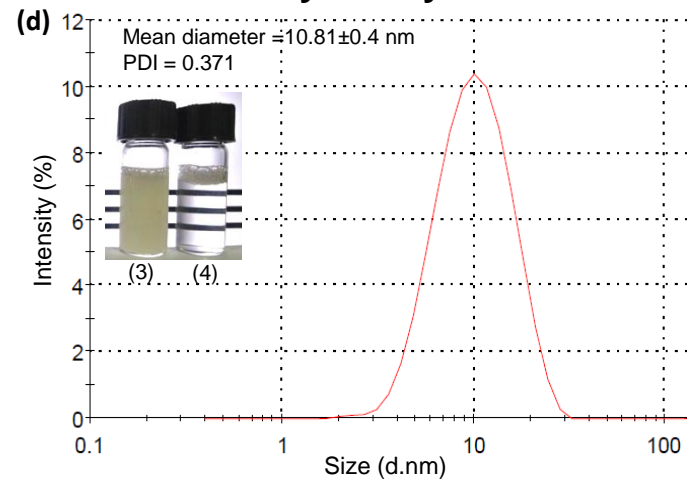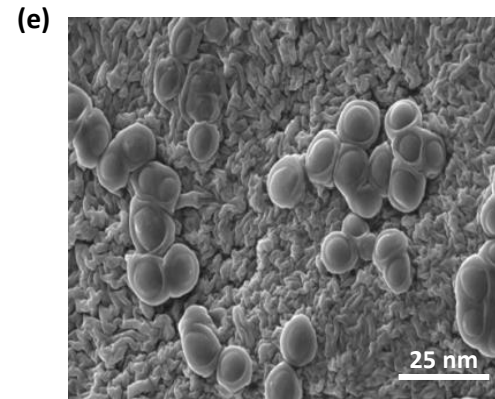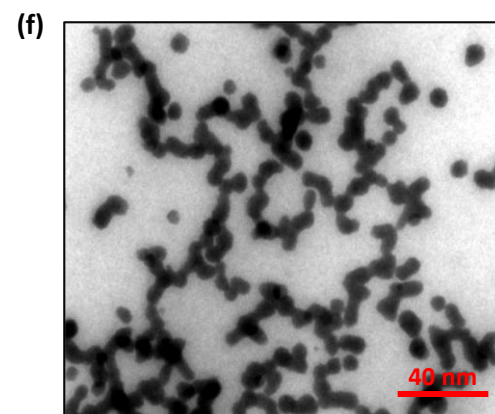

Figure S5. Characterization of NEs. DLS particle size distribution of (a) eugenol-NE and (d) methyl salicylate-NE. The insets depict the emulsion of eugenol (1), eugenol-NE (2), emulsion of methyl salicylate (3) and methyl salicylate-NE (4). SEM images of (b) eugenol-NE and (e) methyl salicylate-NE. TEM images of (c) eugenol-NE and (f) methyl salicylate-NE.

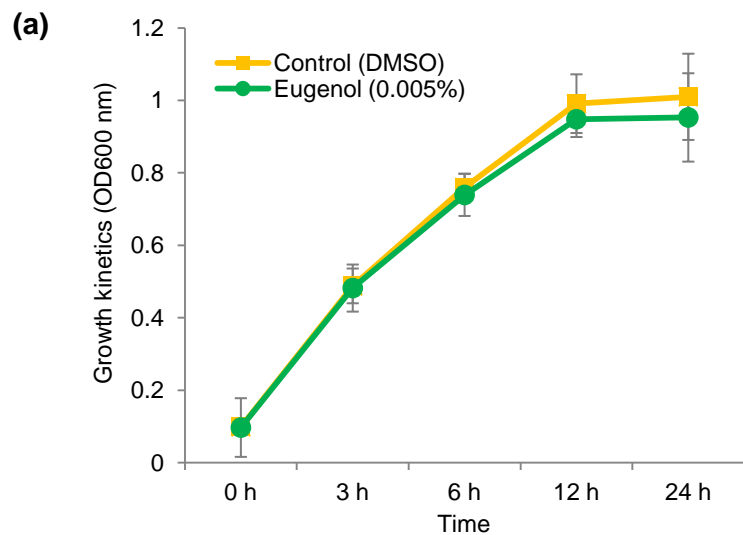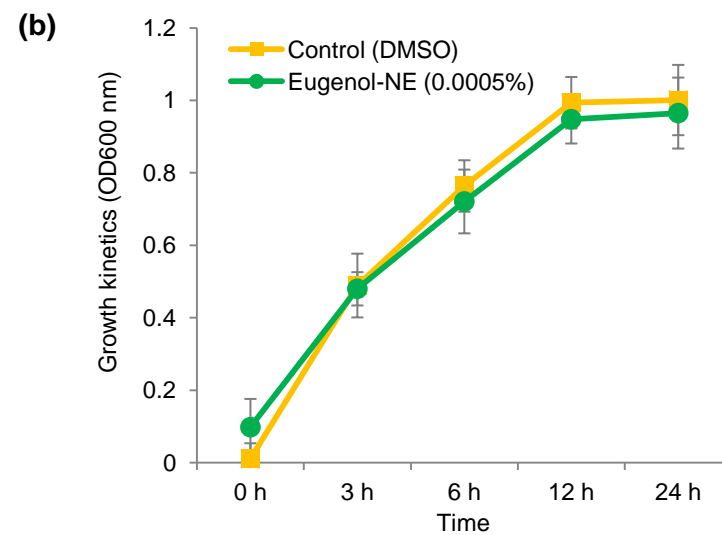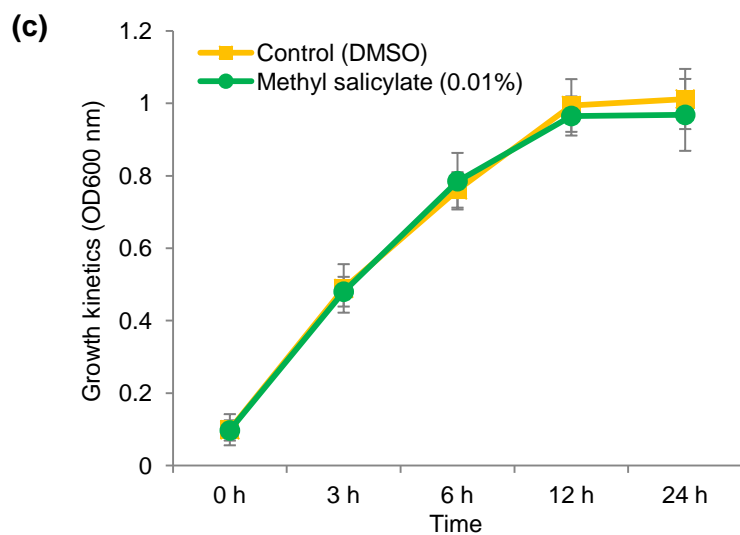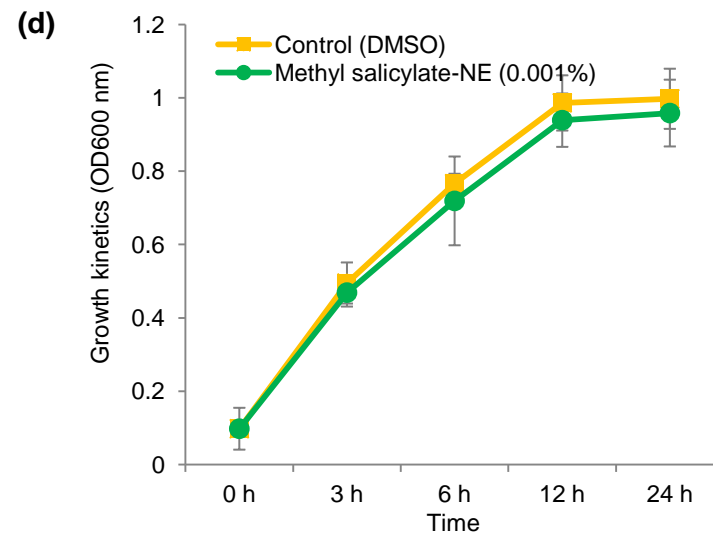

Figure S6. Growth kinetics of ECOH in the presence or absence of eugenol (a) eugenol-NE (b), methyl salicylate (c) and methyl salicylate-NE with indicated concentrations for the period of 24 h. DMSO was used as a solvent control for CGF-EO and WGF-EO, whereas the mixture of DW, surfactant (S; Tween 80) and co-surfactant (CS; propylene glycol) in the ratio of 94.7:0.2:0.1 was used as a solvent control for CGF-NE and WGF-NE.

(a)

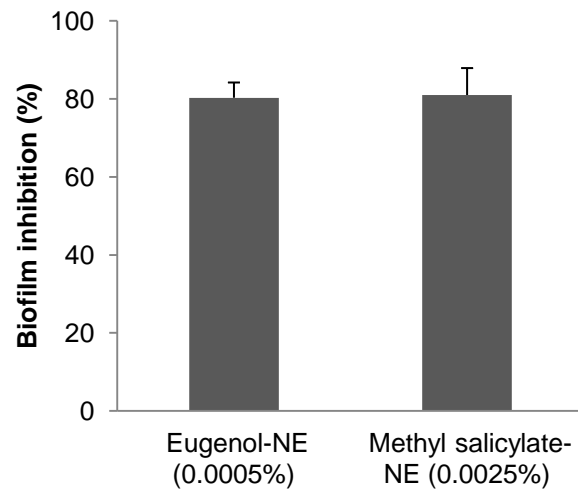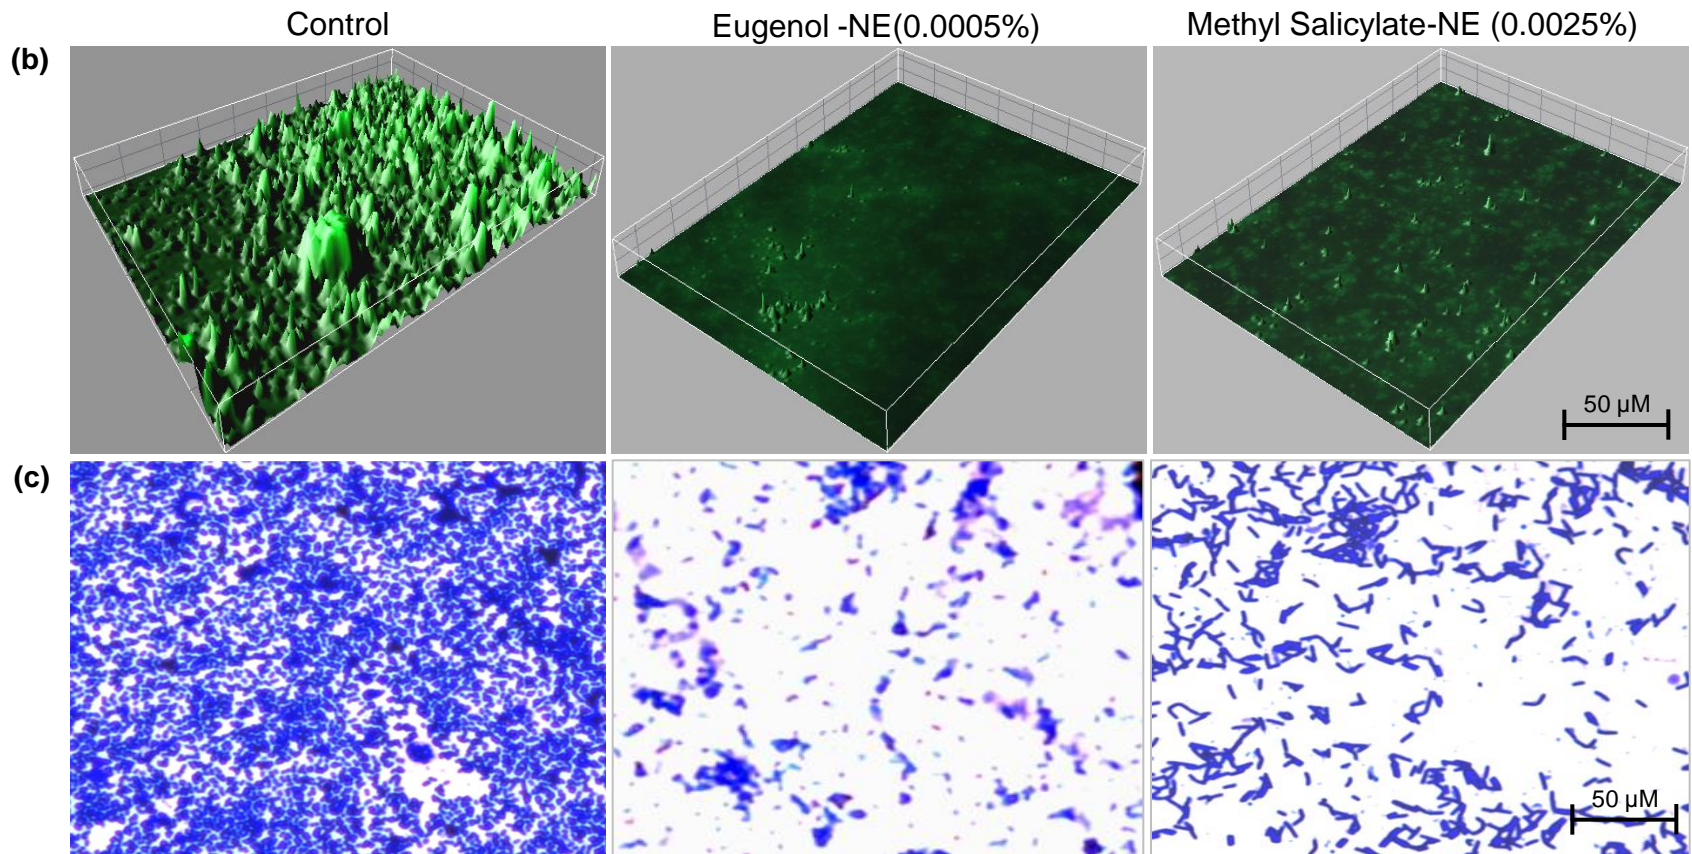

Figure S7. Anti-biofilm activity of eugenol-NE and methyl salicylate-NE. Inhibition of biofilm in the presence of NEs was measured after treatment of 24 h by ELISA in 96-well plates (a), confocal laser microscopy (b) and CV cell staining (c) techniques. The mixture of DW, surfactant (S; Tween 80) and co-surfactant (CS; propylene glycol) in the ratio of 94.7:0.2:0.1 was used as a solvent control.



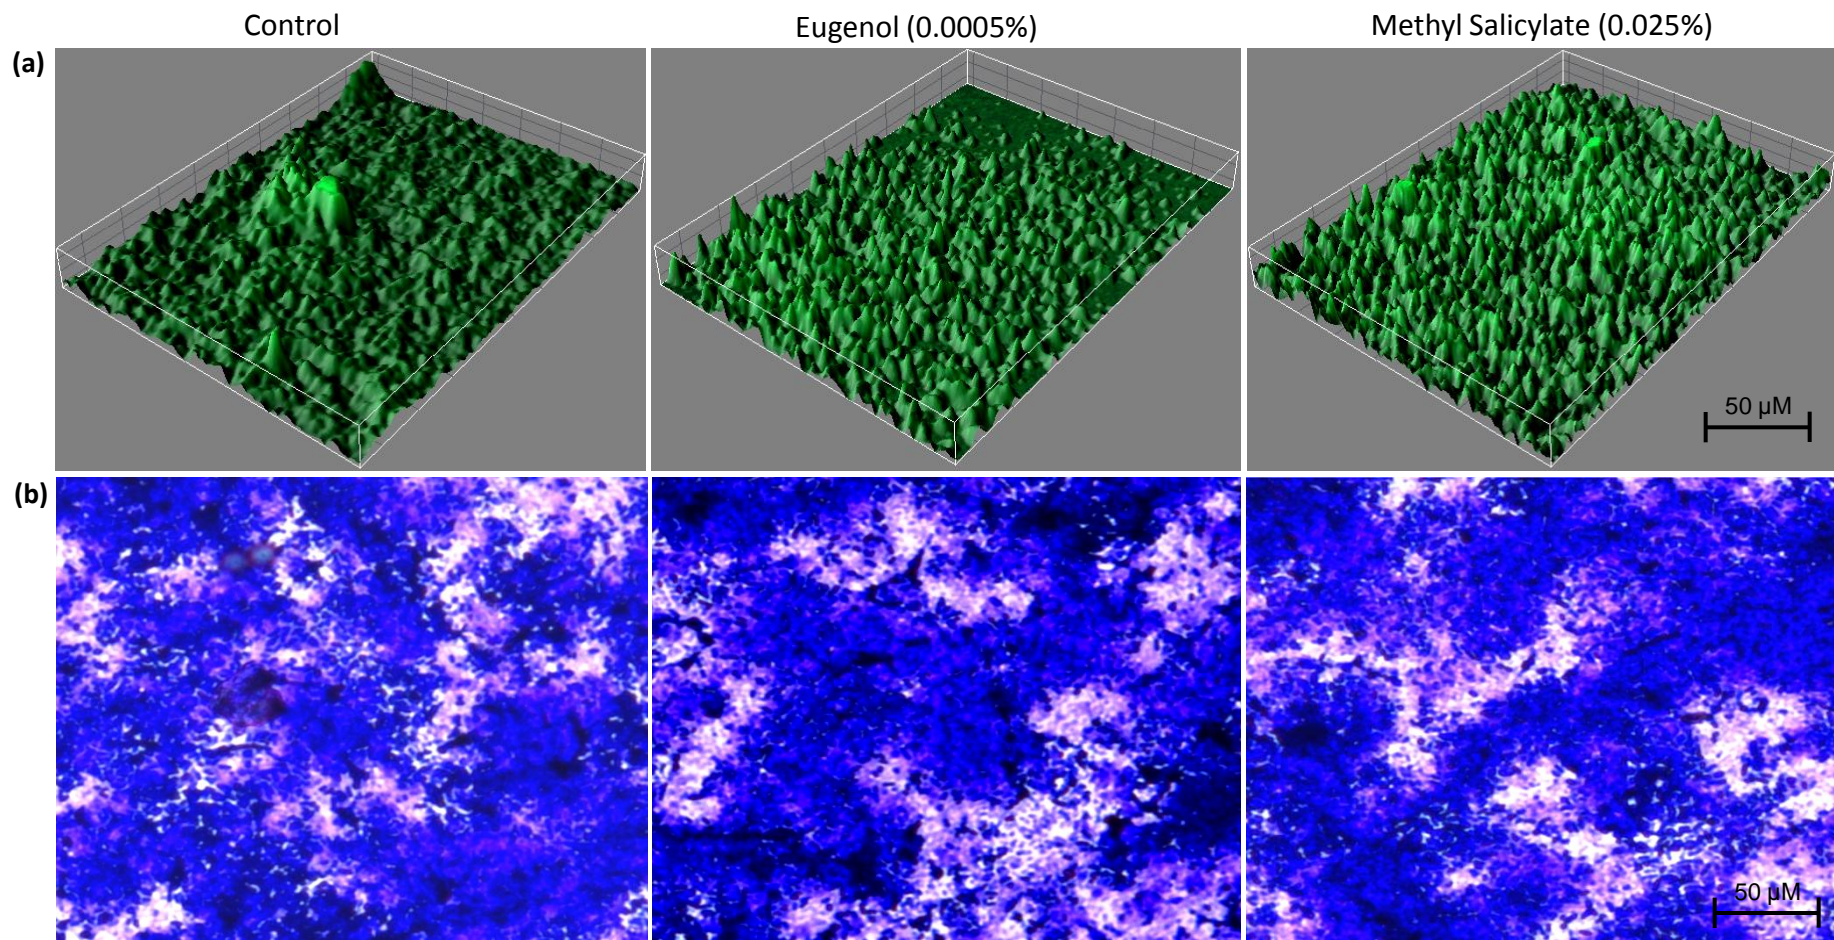

Figure S8. Biofilm inhibition of ECOH by eugenol and methyl salicylate, measured by (a) confocal laser microscopy and (b) CV cell staining technique. DMSO was used as a solvent control.

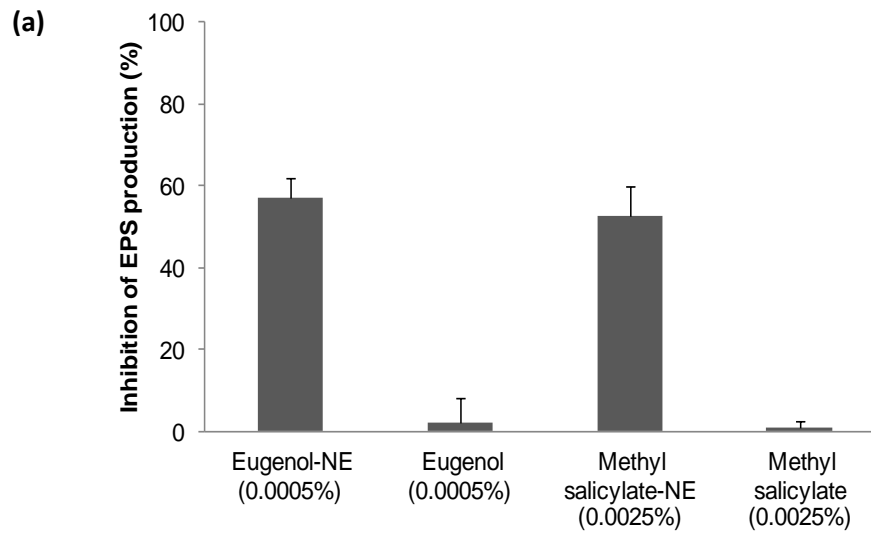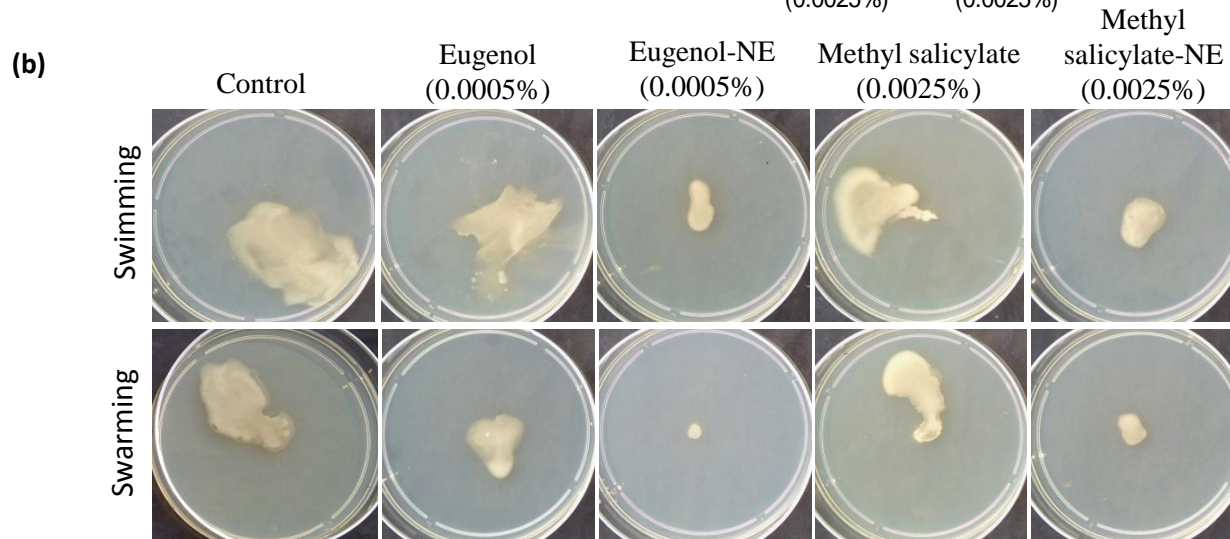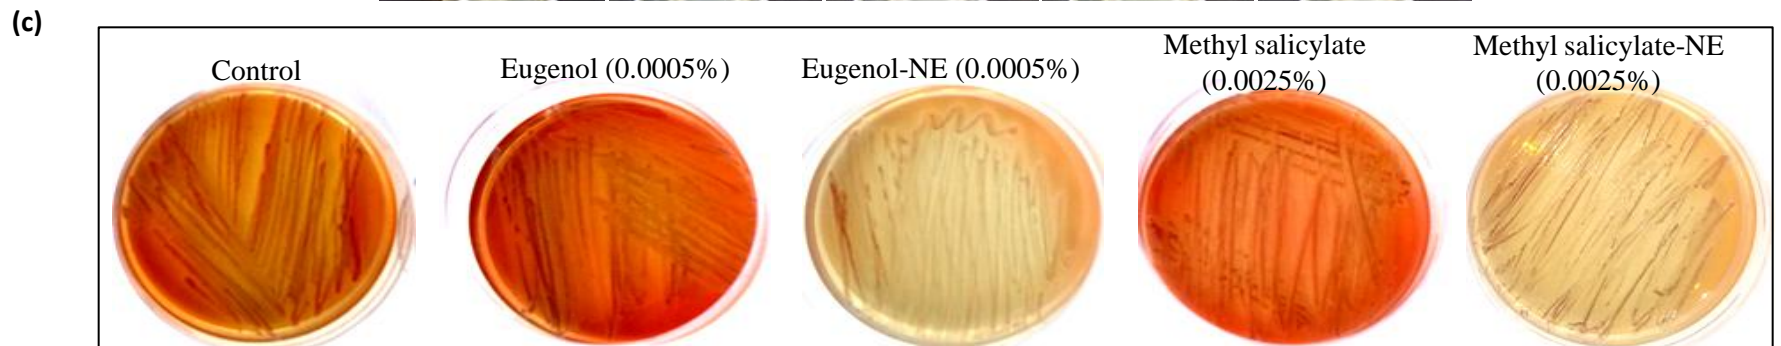

Figure S9. Effect of eugenol-NE and methyl salicylate-NE on the production of virulence factors, namely (a) EPS production, (b) swimming-swarming motilities, and (c) fimbriae production in ECOH cells treated for 24 h. The mixture of DW, surfactant (S; Tween 80) and co-surfactant (CS; propylene glycol) in the ration of 94.7:0.2:0.1 was used as a solvent control.
